# 1 **Title: Microbial regulation of enteric eosinophils and its impact on tissue** 2 **remodeling and Th2 immunity**

3 **Authors:** Rodrigo Jiménez-Saiz<sup>1,§</sup>, Varun C. Anipindi<sup>1</sup>, Heather Galipeau<sup>2</sup>, Yosef Ellenbogen<sup>1</sup>,  
4 Roopali Chaudhary<sup>1</sup>, Joshua F. Koenig<sup>1</sup>, Melissa E. Gordon<sup>1</sup>, Tina D. Walker<sup>1</sup>, Talveer S.  
5 Mandur<sup>1</sup>, Soumeya Abed<sup>1</sup>, Alison Humbles<sup>3</sup>, Derek K. Chu<sup>4</sup>, Jonas Erjefält<sup>5,6</sup>, Kjetil Ask<sup>1</sup>, Elena  
6 F. Verdú<sup>2</sup>, Manel Jordana<sup>1</sup>.

## 7 **Affiliations:**

8 <sup>1</sup>McMaster Immunology Research Centre (MIRC), Department of Pathology & Molecular  
9 Medicine, and <sup>4</sup>Department of Medicine, McMaster University, Hamilton, ON, L8N 3Z5, Canada.

10 <sup>2</sup>Farncombe Family Digestive Health Research Institute, McMaster University, Hamilton, ON,  
11 L8N 3Z5, Canada.

12 <sup>3</sup>Department of Respiratory, Inflammation and Autoimmunity, MedImmune, Gaithersburg,  
13 Maryland, USA.

14 <sup>5</sup>Department of Experimental Medical Science, Lund University, SE-22184 Lund, Sweden

15 <sup>6</sup>Department of Respiratory Medicine and Allergology, Lund University Hospital, SE-22185  
16 Lund, Sweden

17 Correspondence to: Manel Jordana, MD, PhD. Dept. of Pathology & Molecular Medicine,  
18 McMaster Immunology Research Centre, McMaster University, MDCL 4013, 1280 Main St W,  
19 Hamilton, ON, L8S 4K1, Canada. Email address: [jordanam@mcmaster.ca](mailto:jordanam@mcmaster.ca)

20 § Current address: Department of Immunology & Oncology, National Center for Biotechnology  
21 (CNB)-CSIC, E-28049, Madrid, Spain

## 23 **ABSTRACT**

24 Eosinophils have emerged as multifaceted cells that contribute to tissue homeostasis. However, the  
25 impact of the microbiota on their frequency and function at mucosal sites remains unclear. Here,  
26 we investigated the role of the microbiota in the regulation of enteric eosinophils. We found that  
27 small intestinal (SI) eosinophilia was significantly greater in germ-free (GF) mice compared to  
28 specific pathogen free (SPF) controls. This was associated with changes in the production of enteric  
29 signals that regulate eosinophil attraction and survival, and was fully reversed by complex  
30 colonization. Additionally, SI eosinophils of GF mice exhibited more cytoplasmic protrusions and  
31 less granule content than SPF controls. Lastly, we generated a novel strain of eosinophil-deficient  
32 GF mice. These mice displayed intestinal fibrosis and were less prone to allergic sensitization as  
33 compared to GF controls. Overall, our study demonstrates that commensal microbes regulate  
34 intestinal eosinophil frequency and function, which impacts tissue repair and allergic sensitization  
35 to food antigens. These data support a critical interplay between the commensal microbiota and

36 intestinal eosinophils in shaping homeostatic, innate and adaptive immune processes in health and  
37 disease.

## 38 INTRODUCTION

39 Eosinophils have traditionally been described as effector inflammatory cells that are  
40 protective against parasitic infections but detrimental in allergic disease<sup>1,2</sup>. New evidence has  
41 considerably broadened this paradigm as eosinophils have now been shown to play complex roles  
42 in mucosal immunity and tissue remodeling<sup>3-8</sup>. For example, intestinal eosinophils and eosinophil  
43 peroxidase (EPO) are critical for the initiation of Th2 responses (IgE) to food allergens in the  
44 gastrointestinal (GI) tract<sup>6,9</sup>. Furthermore, intestinal accumulation of eosinophils has been  
45 associated with the severity of inflammatory bowel disease (IBD)<sup>10,11</sup>. Conversely, intestinal  
46 eosinophils secrete large quantities of IL-1 receptor antagonist, thus reducing inflammation in  
47 IBD<sup>12,13</sup>. Eosinophils have also been proposed to play a role in homeostatic tissue remodeling as  
48 their presence is increased at tissues with a high turnover such as the intestine and the uterus<sup>4,14</sup>.  
49 Eosinophils are equipped with damage-sensing receptors the ligation of which leads to the  
50 production of factors involved in tissue repair (*eg.* TGF- $\alpha$  and - $\beta$ , vascular-endothelial growth  
51 factor (VEGF), *etc.*)<sup>15</sup>. Hence, deciphering the factors that regulate eosinophils in the GI mucosa  
52 is relevant to understanding their role in health and disease.

53 There is growing evidence on the role of the microbiota in regulating immune responses  
54 and maintaining intestinal homeostasis<sup>16,17</sup>. Studies in germ-free (GF) mice have demonstrated  
55 that the microbiota is crucial for the maturation of the adaptive immune system in the small  
56 intestine (SI)<sup>18</sup>. For example, GF mice have fewer CD4<sup>+</sup> T cells, intraepithelial lymphocytes, and  
57 lower IgA-producing plasma cells in the lamina propria (LP) of the SI as compared to specific  
58 pathogen free (SPF) mice<sup>16,17,19,20</sup>. Yet, knowledge on the effect of the microbiota on innate cells  
59 that are indigenous to the intestinal tract, such as eosinophils, is scarce<sup>13,21</sup>.

60 Here we examined the impact of the microbiota on eosinophil frequency and function in  
61 the SI. We found that eosinophil frequency was enriched along the SI of GF mice relative to SPF  
62 controls. This was associated with local changes in the production of signals involved in the  
63 attraction, retention and survival of eosinophils. This relative eosinophilia was also observed in  
64 other mucosal sites, but not in sterile tissues, and was corrected by repletion of microbiota through  
65 co-habitation with altered Schaedler flora (ASF)- or SPF-mice. Additionally, SI eosinophils of GF  
66 mice exhibited more cytoplasmic protrusions and less granule content than SPF controls; this was  
67 consistent with the lower EPO levels detected in intestinal homogenates from GF mice. Lastly, we  
68 generated a novel strain of eosinophil-deficient ( $\Delta$ dblGATA1) mice on a GF background. In this  
69 system, the absence of eosinophils was associated with increased collagen accumulation in the  
70 submucosa as well as reduced allergic sensitization. This study illustrates a novel role for the  
71 microbiota in regulating mucosal eosinophils and tissue homeostasis.

72

## 73 MATERIAL AND METHODS

74 **Mice and colonization procedures.** Age-, vendor-, and strain-matched controls were used in all  
75 the experiments. C57BL/6 and BALB/c mice were obtained from Charles River.  $\Delta$ dblGATA1

76 (GATA) mice were bred in house. A novel strain of GF GATA mice was generated by two-cell  
77 embryo transfer, as previously described<sup>22</sup>. Mice were bred and maintained in flexible film  
78 isolators in McMaster's Axenic Gnotobiotic Unit. GF status was monitored weekly by DNA  
79 immunofluorescence (SYTOX Green), as well as anaerobic and aerobic culture of cecal stool  
80 samples. Mice had unlimited access to autoclaved food and water. ASF-colonized mice were  
81 originally generated by co-housing female colonizers harbouring ASF, with GF mice. ASF-  
82 colonized mice were then bred for 3 generations in individually ventilated racks within the Axenic  
83 Gnotobiotic Unit<sup>23</sup>. Pathogen contamination and microbiota diversification were evaluated in  
84 mouse fecal contents every 2 weeks in sentinels by PCR for *Helicobacter bilis*, *H. ganmani*, *H.*  
85 *hepaticus*, *H. mastomyrinus*, *H. rodentium*, *Helicobacter spp.*, *H. typhlonius*, and *Pneumocystis*  
86 *murina*. Mouse serum was also tested for murine viral pathogens by multiplexed fluorometric  
87 immunoassay/enzyme-linked immunosorbent assay (ELISA)/indirect fluorescent antibody tests<sup>23</sup>.  
88 SPF colonization was performed by co-habitation of GF mice with SPF mice for a minimum of 1  
89 month. In some experiments, mice were fed an elemental diet based on amino acids (TD1084 and  
90 TD 130916; Harlan Laboratories Inc.) for 3 generations prior to use. All procedures were approved  
91 by the McMaster University Animal Research Ethics Board.

92 **Intestinal cell isolation.** As previously described<sup>24,25</sup>, after flushing intestinal contents with cold  
93 PBS, fat was removed, and intestines were opened longitudinally and cut into approximately 3-5  
94 mm pieces. Mucus was eliminated by washing with phosphate-buffered saline (PBS) containing  
95 10 mM HEPES and 4  $\mu$ M dithiothreitol (DTT) (Sigma) for 15 min at 37°C while on a shaker.  
96 Epithelial cells were removed by 3 rounds of 10 min-washes at 37°C, under shaking, in PBS  
97 containing 10% fetal bovine serum (FBS), 10 mM HEPES and 5 mM ethylenediaminetetraacetic  
98 acid (EDTA). The tissues were then digested in 0.125 U/mL Collagenase A (Roche) with 130  
99 U/mL DNase I (Roche) in 10% FBS containing RPMI for 50–60 min in a shaker at 37°C. Lastly,  
100 the digested tissues were pressed through a 40  $\mu$ m nylon strainer (Falcon) and immune cells were  
101 purified via 40/70% Percoll (GE Healthcare) gradient and centrifugation.

102 **Tissue processing and cell isolation.** Bone marrow<sup>6</sup>, spleen<sup>26</sup>, uterus<sup>27</sup>, vaginal tract<sup>27</sup>, lung<sup>28</sup>  
103 and blood<sup>6</sup> were collected and processed as previously described.

104 **EPO assay.** Intestinal tissue was made up to 100 mg/mL, w/v suspension, in PBS containing  
105 complete protease inhibitors (Roche) and rotor-stator homogenized (Polytron; Kinematica,  
106 Lucerne, Switzerland). The intestinal homogenate was centrifuged (1952 g x 10 min, 4°C) and the  
107 pellet was resuspended in 2 mL of 0.2 % NaCl for 30 sec followed by 2 mL of 1.6% NaCl before  
108 centrifugation and resuspension at 100 mg/mL in Hank's balanced salt solution (HBSS) containing  
109 0.5% hexadecyltrimethylammonium bromide (HTAB) (Sigma: H5882). Pellets were  
110 homogenized and freeze/thawed 3 times using liquid nitrogen. Finally, samples were  
111 centrifugated, the supernatants were transferred to clean tubes and EPO activity was measured as  
112 previously described<sup>29</sup>.

113 **Cytokine and chemokine array.** Intestinal homogenates were prepared as described<sup>30</sup> with minor  
114 modifications: small intestinal samples were homogenized with 20 mL/g of buffer (T-Per Tissue  
115 Protein Extraction Reagent, Thermo Scientific) containing protease inhibitors (Sigma). Samples

116 were then centrifuged for 30 min and protein concentration was measured using the DC Protein  
117 Assay according to standardized protocols (Bio-Rad). Protein concentration in supernatants was  
118 normalized to 1 mg/mL and frozen at -80°C until assay. Cytokine and chemokine levels were  
119 determined via a cytokine 44-plex discovery assay (MD44) and a high-sensitivity 18-plex  
120 discovery assay (MDHSTC18) performed by Eve Technologies (Calgary, AB). To visualize broad  
121 differences in the metabolite signals, raw values were converted to a log scale. The fold change in  
122 protein levels between GF and SPF mice was represented on a heatmap with R software using the  
123 heatmap package. Data analysis of cycle threshold values was conducted using the Relative  
124 Expression Software Tool-384 (REST-384) version 1.

125 **Flow cytometry.** Antibodies were obtained from eBioscience, BD Biosciences, or BioLegend. In  
126 all assays, cells were incubated with anti-Fc $\gamma$ RII/III before incubation with fluorochrome-  
127 conjugated antibodies. Dead cells were excluded by propidium iodide uptake (Sigma) or fixable  
128 viability dye eFluor780 (eBioscience) and gated on singlets. On average, a minimum of 300,000  
129 live and singlet cells were analyzed. Fluorescence minus one (FMO) and isotype controls were  
130 used for gating. Data were acquired on an LSR II or Fortessa (BD) and analyzed using FlowJo  
131 (Treestar). Flow-sorting experiments were performed on a FACS ARIA III (BD).

132 **Food allergy model.** Peanut butter (3.75 mg; ~1 mg of protein; Kraft, Northfield, IL) with 10  $\mu$ g  
133 of cholera toxin (List Biologicals, Campbell, CA) in 0.5 mL of PBS was administered  
134 intragastrically (Delvo SA, Biel, Switzerland) weekly for 4 weeks. Serum was collected by retro-  
135 orbital bleeding and analyzed for peanut-specific Igs via sandwich ELISA<sup>31-33</sup>.

136 **Histology.** Intestinal segments were collected and fixed in 10% formalin for 24 h, and then washed  
137 with 70% ethanol and paraffin embedded. Sections were stained with the Protocol Hema 3 stain  
138 set (Fisher Scientific, Hampton, NH) and Masson's Trichrome method<sup>34,35</sup>. For image analysis of  
139 histological sections, Masson's trichrome stained tissue slides were scanned (VS120-ASW v2.9  
140 slide scanner, with UPlanSApo 20x objective, Olympus) and analyzed using HALO® Image  
141 Analysis Platform (v2.2.1870.34, Indica Labs Inc, Corrales, New Mexico) using Area  
142 Quantification module (v1.0).

143 **Transmission electron microscopy.** Immediately after excision, tissues were immersed in  
144 fixative consisting of 3% formaldehyde and 1% glutaraldehyde in 0.1-M phosphate buffer (pH  
145 7.2). After the initial fixation, samples were post-fixed in 1% osmium tetroxide for 1 h, dehydrated  
146 in graded acetone solutions, and embedded in Polybed 812 (Polysciences, Inc.). Ultrathin sections  
147 (60–80 nm) were cut on an LKB MK III ultratome and routinely contrasted with uranyl acetate  
148 and lead citrate. The sections were examined using a FEI Tecnai Spirit BioTWIN transmission  
149 electron microscope (Fei)<sup>6</sup>. Eosinophil circularity was calculated as  $4\Pi(\text{total cell area/squared cell}$   
150  $\text{membrane perimeter})$ ; a value of 1.0 indicates a perfect circle. The granule content was calculated  
151 as (cytoplasm area = total cell area - nuclear area) - (the sum of all granule areas).

152 **Statistics.** Data were analyzed and graphed with GraphPad Prism 8 software (GraphPad Software).  
153 Continuous data are expressed as means  $\pm$  SEMs and were analyzed by using 1-way ANOVA with  
154 Bonferroni *post hoc* tests and unpaired Student's *t* test. Differences were considered statistically  
155 significant at a *P* value of less than 0.05 or as indicated.

156

## 157 RESULTS

### 158 The microbiota regulates the frequency of intestinal eosinophils

159 In order to quantify eosinophil frequency, LP cells from the SI were isolated and evaluated  
160 by flow cytometry<sup>6</sup>. Consistent with previous reports<sup>6,36</sup>, intestinal eosinophils were identified as  
161 CD45<sup>+</sup> SSC<sup>high</sup> Siglec-F<sup>+</sup> cells and expressed high levels of CD11b (**Fig. 1A**). This putative  
162 population of eosinophils was flow-sorted and stained using Hema 3 to validate their identity. The  
163 microscopic analysis showed hallmark morphological features (*i.e.* lobular polymorphic nucleus  
164 and eosinophilic granular cytoplasm) of eosinophils<sup>1,2</sup> in >95% of the cells (**Fig. 1B**).

165 Next, we compared eosinophil frequency in the SI of SPF and GF mice. It is known that in  
166 GF mice, compared to SPF, the total mass of the SI and the total surface area are decreased, the  
167 LP is thinner and less cellular and the cell renewal rate is lower<sup>18,37-43</sup>. Therefore, we considered  
168 that the most informative analysis would be to focus on the frequency of immune cells. To account  
169 for possible differences in strains biased towards Th1 and Th2 immunity<sup>44</sup>, both C57BL/6 and  
170 BALB/c strains were assessed. The frequency of intestinal eosinophils from total cells in GF mice  
171 was ~2-fold higher than in SPF controls, regardless of the strain (**Fig. 1C**). We then assessed the  
172 distribution of eosinophils along the SI tract of GF and SPF mice. Regardless of colonization  
173 status, eosinophils were enriched predominantly in the proximal end of the SI (duodenum) and  
174 reduced in the distal end (ileum) (**Fig. 1D**). Nevertheless, within all sections of the SI, GF mice  
175 harbored a greater proportion of eosinophils than SPF control mice. These data demonstrate that  
176 the microbiota significantly influences the basal tissue eosinophilia of the SI LP.

177

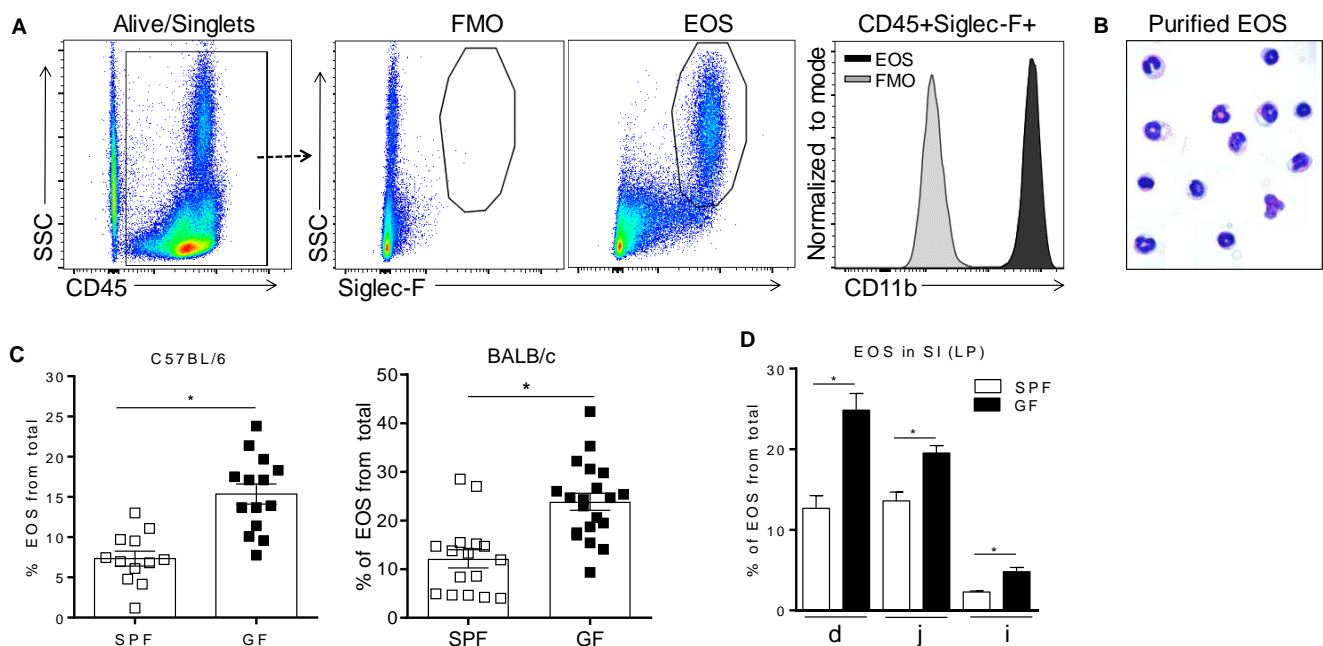

178 **Figure 1.** Flow cytometric identification of small intestinal eosinophils (EOS) as live  
179 singlet CD45<sup>+</sup>Siglec-F<sup>+</sup> cells (A), morphologic validation (B) and assessment of their frequency  
180 in the small intestine (SI) of SPF and GF C57BL/6 and BALB/c mice (C, D). The frequency of

181 EOS from total cells in the lamina propria (LP) of different sections of the SI including duodenum  
182 (d), jejunum (j) and ileum (i) of C57BL/6 mice (D). Pooled data from 3-4 experiments (n=12-20)  
183 (C) or representative data from 3 experiments (D) represented as mean  $\pm$  SEM, \*P<0.05  
184

### 185 The microbiota sets the basal eosinophilic tone in naturally colonized mucosal 186 surfaces

187 To test whether the differences in eosinophils between GF and SPF mice were directly  
188 related to the microbiota, we colonized GF mice with either a complex (SPF) or simple (ASF)  
189 microflora<sup>23</sup>. To this end, we co-housed separate groups of GF mice with either ASF or SPF mice.  
190 The data show that the eosinophilia seen in the SI of GF mice was partially attenuated by  
191 colonization with a minimal assortment of only 8 well-defined bacterial species<sup>23</sup> using ASF mice.  
192 Eosinophilia was fully attenuated with complex colonization using SPF flora (**Fig. 2A**). These data  
193 show a graded regulatory relationship between the complexity of the microbiota and tissue  
194 eosinophil levels.

195 Since the microbiota regulated the frequency of enteric eosinophils, we next examined  
196 whether GF induced eosinophilia was present in other naturally colonized mucosal sites (large  
197 intestine, vaginal tract and lung), sterile—or poorly colonized—mucosal sites (uterus)<sup>45</sup> and non-  
198 mucosal sites (spleen). The frequency of eosinophils was also significantly higher in the large  
199 intestine, vaginal tract and lung of GF mice compared to SPF (**Fig. 2B-D**) but not in sterile tissues  
200 such as the spleen (**Fig. 2E**) and uterus (**Fig. 2F**). These data further support the concept that the  
201 frequency of tissue eosinophils is dependent on the natural colonization status.

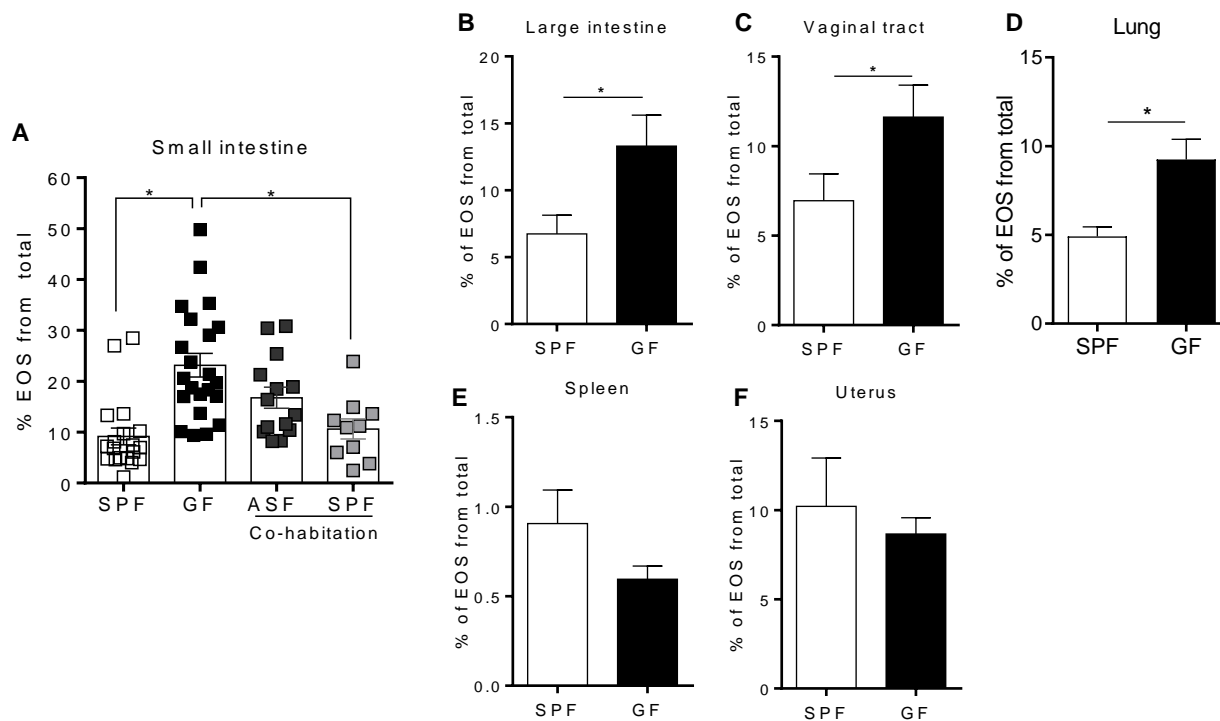

202 **Figure 2.** Separate groups of GF mice were colonized by co-habitation with ASF or SPF mice and  
203 the presence of small intestinal eosinophils (EOS) was assessed (A). Assessment of EOS frequency

204 in the large intestine, vaginal tract, lung, spleen and uterus of SPF and GF mice by flow cytometry  
205 (B-F). Pooled data from 2-5 experiments (n=8-22) represented as mean  $\pm$  SEM, \*P<0.05.  
206

### 207 **The maturity of the immune system is not associated with intestinal eosinophilia**

208 It is well established that the adaptive immune system of GF mice is immature, particularly  
209 as it refers to T cells<sup>46</sup>. Consistent with previous observations<sup>47,48</sup>, we found that the frequency of  
210 CD4<sup>+</sup> T cells was significantly lower in the SI of GF mice compared to SPF controls (**Fig. 3A**). In  
211 contrast, there were no statistically significant differences in the frequency of B cells, dendritic  
212 cells (DCs), macrophages and mast cells (**Fig. 3A**). To investigate whether the eosinophilia  
213 observed in GF conditions was due to the absence of colonization or inherent to an immature  
214 immune system, we generated microbiota-competent mice with an immature immune system<sup>49</sup>.  
215 To this end, BALB/c mice, fed with an elemental (amino acid) diet and housed in a SPF  
216 environment, were bred for 3 generations. Fewer Peyer's patches and a lower frequency of CD4<sup>+</sup>  
217 T cells were observed in the LP, thus confirming the immaturity of the adaptive immune system  
218 of these mice (**Fig. 3B**). We did not find changes in the frequency of B cells, macrophages or  
219 eosinophils. These findings indicate that the relative eosinophilia in GF mice is likely due to a lack  
220 of microbial-derived signals rather than immune immaturity *per se*.  
221

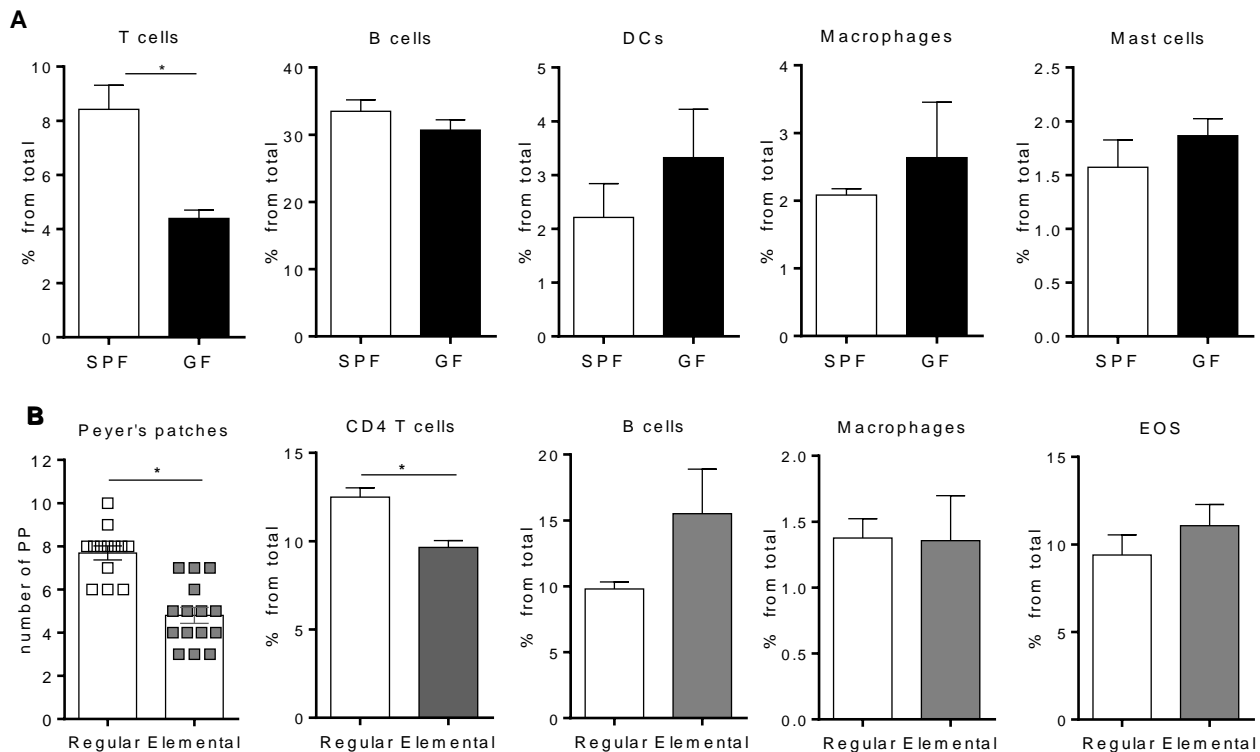

222 **Figure 3.** Flow cytometric characterization of adaptive and innate immune compartments (A, B)  
223 in the small intestine of GF and SPF mice fed a regular (A) or elemental (B) diet (B). Pooled data  
224 from 2-4 experiments (n=6-22) represented as mean  $\pm$  SEM, \*P<0.05.  
225  
226

## 227 The microbiota regulates eosinophil attraction and retention signals in mucosal tissues

228 Tissue accumulation of eosinophils associated with chronic intestinal inflammation is  
 229 typically attributed to increased eosinopoiesis<sup>50</sup>. Here, we investigated whether the same  
 230 mechanism applies to constitutive eosinophilia in healthy GF mice. We found that there were no  
 231 differences in BM eosinophils between GF and SPF mice, nor were differences in EOS circulating  
 232 in the peripheral blood (data not shown). This suggested that eosinophil accumulation in mucosal  
 233 sites of otherwise healthy GF mice might be mediated by increased expression of attraction and/or  
 234 retention signals in the SI, large intestine, lung and vaginal tract.

235 To identify signals associated with eosinophil migration and retention at the tissue level,  
 236 we analyzed chemokine and cytokine levels in the proximal (duodenum) and distal (ileum) SI  
 237 segments of GF and SPF mice (**Fig. 4A**). Overall, cytokine and chemokine production was lower  
 238 in the SI of GF mice as compared to SPF; this is consistent with the underdeveloped mucosal  
 239 immune system reported in GF mice<sup>18</sup>. Nevertheless, compared to SPF controls, GF mice  
 240 exhibited a significant increase in IL-3<sup>51</sup> and VEGF<sup>52,53</sup>, which are associated with eosinophil  
 241 chemotaxis and survival (**Fig. 4B**). Furthermore, we observed a significant decrease in the levels  
 242 of IL-11<sup>54</sup> and CXCL9<sup>55</sup> in GF mice, which regulate eosinophil recruitment (**Fig. 4B**). These data  
 243 suggest that the microbiota regulates signals involved in the attraction, retention and survival of  
 244 eosinophils in the SI, the absence of which results in the relative eosinophilia found in GF  
 245 conditions.<sup>51</sup>

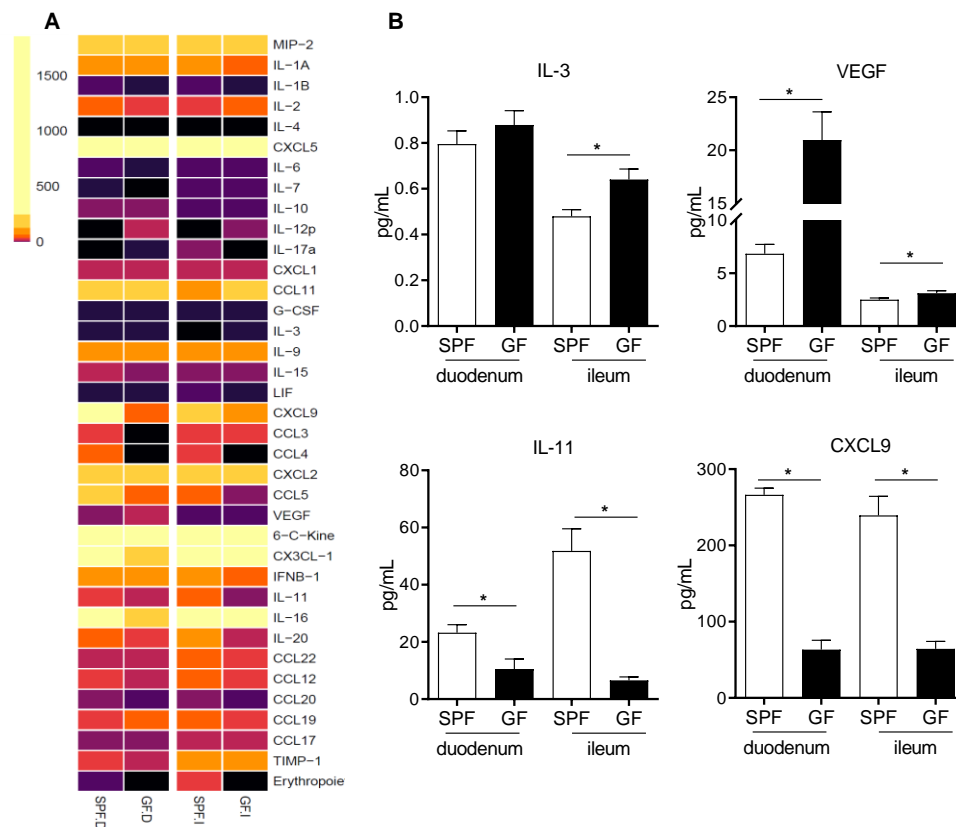

246 **Figure 4.** Heatmap of chemokine and cytokine protein levels in proximal (duodenum; D)  
 247 and distal (ileum; I) small intestinal homogenates from GF and SPF mice as determined by protein



248 array (A). Relevant proteins differentially produced both in the proximal and distal small intestine  
249 of SPF and GF mice (B). Data from 6 mice (A, B) represented as mean  $\pm$  SEM, \*P<0.05.

250

### 251 Eosinophil morphology and functionality are influenced by the microbiota

252 In order to evaluate eosinophil function in GF mice, we performed comprehensive  
253 transmission electron microscopy analysis of small intestinal sections from GF and SPF mice (**Fig.**  
254 **5A-D**). Eosinophils in GF mice (**Fig. 5B-D**) exhibited profound morphological alterations in  
255 comparison to SPF controls (**Fig. A**). Eosinophils from GF mice had significantly more  
256 cytoplasmic protrusions; this was quantified and measured as reduced circularity of the outer  
257 membrane perimeter (**Fig. 5E**). Signs of eosinophil cytoplasmic lysis (ECL), potentially associated  
258 with the cytoplasmic protrusions, were found, although very rarely, in eosinophils from GF mice  
259 (**Fig. 5D**). While increased cytoplasmic protrusions are indicative of cell activation, we did not  
260 find evidence of eosinophil degranulation in either of them. Strikingly, intestinal eosinophils from  
261 GF mice had significantly less granule content (**Fig. 5F**) and granules of smaller size than SPF  
262 counterparts. To substantiate these findings, the degranulation status of eosinophils was also  
263 determined by quantifying EPO activity<sup>29,56</sup> in SI homogenates of GF and SPF mice. Despite the  
264 extensive eosinophilia (**Fig. 1C**), significantly lower EPO activity was detected in GF mice (**Fig.**  
265 **5G**) compared to SPF controls.

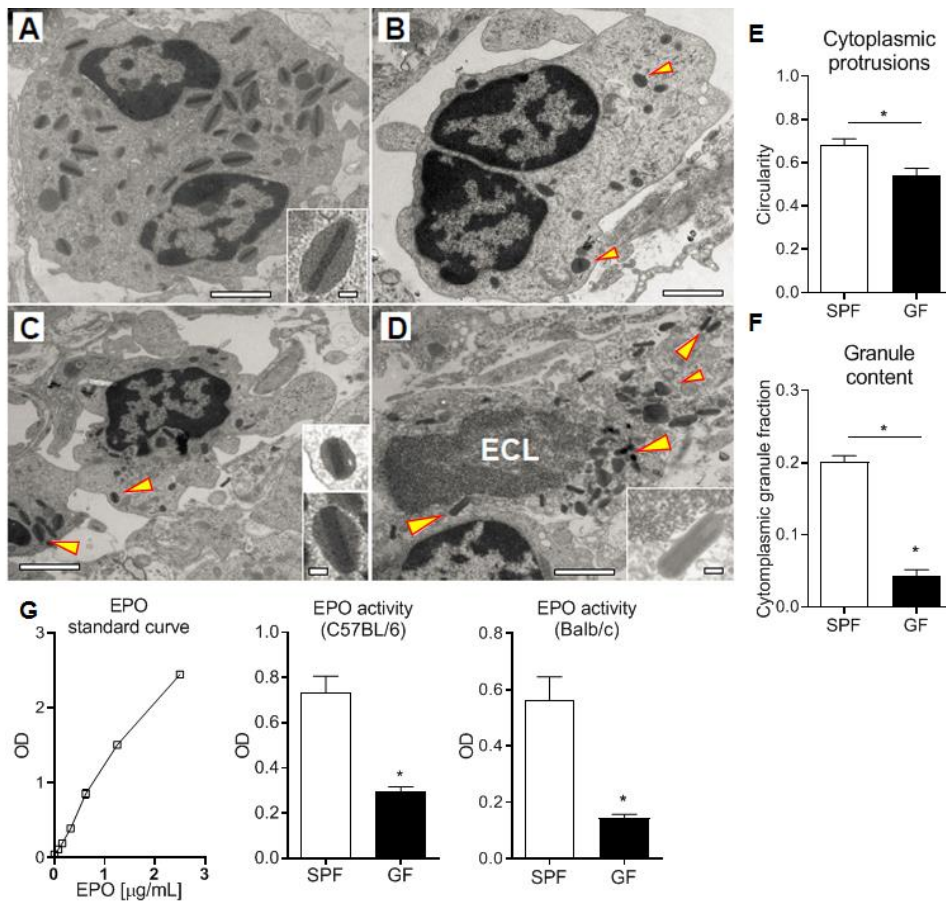

266 **Figure 5.** Normal SI eosinophils transmission electron microscopy ultrastructure (A),  
267 showing bi-lobed nuclei and a high density of granules composed of an electron-dense core  
268 surrounded by an electron-lucent matrix rich in EPO (arrowhead). SI eosinophils from GF mice  
269 (B-D) exhibit cytoplasmic protrusions, measured as reduced circularity (E), lower content of  
270 cytoplasmic granules (F) and, occasionally, ECL signs (D). Assessment of EPO in intestinal  
271 homogenates of SPF and GF mice (G). Representative (A-D) and pooled (E-F) data from 6 mice,  
272 and pooled data from 2 independent experiments (n=6) (G) represented as mean  $\pm$  SEM, \*P<0.05.  
273

## 274 **The microbiota modulates eosinophil-mediated intestinal remodeling and allergic** 275 **sensitization**

276 To investigate the functional significance of the morphological features observed in GF  
277 mice, we generated a novel eosinophil-deficient mouse strain ( $\Delta$ dblGATA; GF-GATA) on a GF  
278 background. Given that eosinophils are known to contribute to tissue remodeling, intestinal tissues  
279 were assessed with Masson's Trichome staining<sup>34,35</sup> to evaluate collagen deposition (**Fig. 5A**). To  
280 remove potential bias of field selection, these differences were quantified using the HALO Image  
281 Analysis software. This analysis demonstrated higher collagen density in the submucosal layers of  
282 eosinophil-deficient mice, particularly in GF conditions, as compared to SPF controls (**Fig. 5B**).  
283 These findings suggest that the absence of eosinophils in GF GATA mice is associated with  
284 increased fibrotic tissue remodeling.

285 Intestinal eosinophils play a critical role in the initiation of allergic responses to food  
286 allergens. We have previously demonstrated that eosinophil-deficient ( $\Delta$ dblGATA) mice are  
287 unable to produce peanut-specific immunoglobulins<sup>6</sup>. Additionally, gut dysbiosis has been  
288 associated with a higher risk of developing allergy in humans<sup>57-60</sup>, and GF mice have been shown  
289 to be prone to generate Th2 responses<sup>61,62</sup>. In this context, we evaluated if the lack of microbial  
290 modulation of eosinophils may impact allergic sensitization to foods. We employed an established  
291 food allergy model using intragastric sensitization to peanut<sup>24,32,63,64</sup> in GF mice on a GATA or  
292 C57BL/6 backgrounds. In agreement with previous studies<sup>62</sup>, GF mice generated higher levels of  
293 peanut-specific IgE and IgG1 than SPF controls (**Fig. S1**). However, the production of both  
294 immunoglobulins was significantly lower in GF mice deficient in eosinophils as compared to GF  
295 controls (**Fig. 5C-D**). These findings raise the possibility that the microbiota influences the  
296 development of food allergic sensitization partly through its effects on intestinal eosinophils.

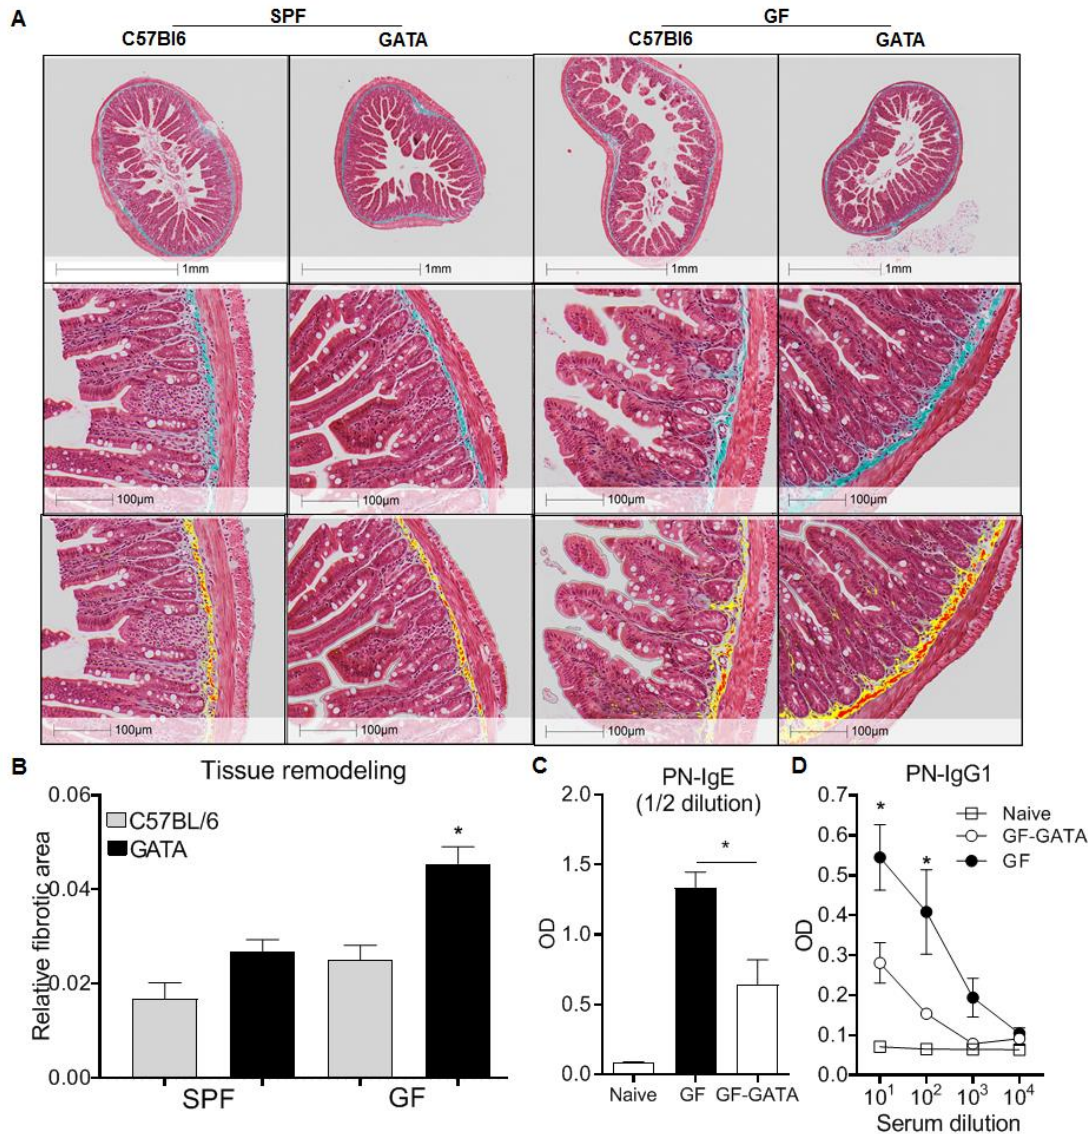

297

298 **Figure 6.** Representative histological examples of intestinal fibrosis (A, upper panels) and  
 299 associated Halo quantification of fibrotic surface on digitalized (20X) sections where yellow and  
 300 red represents Masson's Trichrome positive stain (A, lower panels) and associated quantification  
 301 (B) of overall fibrotic area performed on GF mice, eosinophil deficient GF mice (GATA-GF) and  
 302 controls. GF mice, eosinophil deficient GF mice (GATA-GF) and controls were intragastrically  
 303 sensitized to peanut (PN) and serum levels of PN-specific IgE (C) and IgG1 (D) were determined  
 304 by ELISA. Data from 4-5 mice (A, B) or pooled data from 2 experiments (n=6) (C, D) represented  
 305 as mean  $\pm$  SEM, \*P<0.05.

306

## 307 DISCUSSION

308 Mucosal eosinophils have been traditionally considered recruited proinflammatory cells,  
 309 whose biological benefit is limited to defence against parasitic infections. However, new evidence  
 310 has established that eosinophils also contribute to the initiation, propagation, and resolution of

311 innate and adaptive immune responses, and to homeostatic tissue repair and remodeling<sup>4,5,65,66</sup>.  
312 The diversity of functions ascribed to enteric eosinophils in particular has propelled investigation  
313 into the mechanisms that influence their tissue residence and functionality. In this regard, the  
314 microbiota is known to be critical for the development of the SI mucosal adaptive immune system  
315<sup>18</sup>. Given that eosinophils natively inhabit the SI<sup>67</sup>, we investigated the impact of the microbiota  
316 on intestinal eosinophil frequency and function.

317 Comprehensive quantification of intestinal eosinophils was carried out by flow cytometry  
318<sup>6,36</sup> and further validated by morphological analysis (**Fig. 1A, B**). The total frequency of intestinal  
319 eosinophils in either C57BL/6 or BALB/c was ~2 fold higher in GF mice as compared to SPF  
320 controls (**Fig. 1C**). This is in contrast with the findings by Mishra *et al.*<sup>68</sup>, who did not observe  
321 significant differences in eosinophils numbers in the GI of SPF and GF mice when quantified by  
322 histology. Several factors might have contributed to this discrepancy including the strain of mice  
323 (Black Swiss mice *vs* C57BL/6 and BALB/c), microbiome differences under SPF conditions, the  
324 number of mice utilized in each study (n=5 *vs* n=12-20) and, lastly, the technique employed for  
325 eosinophils quantification, as it is likely that flow cytometry allowed for a more comprehensive  
326 and precise quantification than immunohistochemistry using the eosinophil granule protein, major  
327 basic protein (MBP)<sup>69</sup>. Importantly, we show that intestinal eosinophils in GF mice contain ~~have~~  
328 granules of smaller size and less cytoplasmic granule content than SPF controls, which may lead  
329 to eosinophil underdetection when using MBP-based methods.

330 Consistent with previous reports<sup>6,68</sup>, eosinophils were pre-eminently localized in the  
331 proximal end of the SI and decreased in frequency distally. However, the proportion of eosinophils  
332 in each section was significantly higher in GF mice compared to SPF controls (**Fig. 1D**).  
333 Importantly, colonization of GF mice with a complex microbiota reduced enteric eosinophils to a  
334 frequency comparable to that in SPF mice. This shows that enteric eosinophilia is greatly  
335 influenced by the host intestinal microbiome (**Fig. 1E**).

336 We next considered whether enteric eosinophilia could be an innate response to compensate  
337 for the immaturity of the adaptive immune system that occurs in GF mice. It is known that feeding  
338 SPF mice with an elemental diet results in an immature immune system<sup>70</sup>. Our data show that the  
339 administration of an elemental diet for 3 generations resulted in features indicative of immune  
340 immaturity, such as a reduced number of Peyer's patches and lower CD4<sup>+</sup> T lymphocytes.  
341 However, it did not lead to the eosinophilia identified in GF mice fed with a conventional diet (**Fig.**  
342 **2**), which suggests that enteric eosinophilia is independent of the maturity of the adaptive immune  
343 system and thus dependent on the microbiota.

344 The relative eosinophilia observed in GF mice, its regulation by complex microbial  
345 colonization and its independence of the maturity of the adaptive immune system, along with the  
346 findings of unperturbed eosinopoiesis suggest that the microbiota directly regulates enteric  
347 eosinophils through interactions with cells resident in the mucosal compartment. The significant  
348 changes in the production of signals (IL-3<sup>51</sup>, VEGF<sup>52,53</sup>, IL-11<sup>54</sup> and CXCL9<sup>55</sup>) that regulate  
349 eosinophil migration, attraction and survival of eosinophils in the SI of GF mice supports this  
350 notion (**Fig. 4B**).

351 The formation of cytoplasmic protrusions might relate with a migratory stage and is  
352 indicative of cell activation; despite their abundance in eosinophils from GF mice (**Fig. 5E**), there  
353 were no signs of degranulation. In fact, EPO levels were lower in the SI of GF mice as compared  
354 to SPF (**Fig. 5G**), consistent with the smaller content and size of cytoplasmic granules shown by  
355 transmission electron microscopy (**Fig. 5F**). The drastic morphological changes observed in  
356 eosinophils from GF mice, as compared to SPF, evidence that aspects related to granule processing  
357 and maturation, as well as functionality, are influenced by the microbiota. While eosinophil  
358 activation is often associated with tissue damage, eosinophils also participate in tissue  
359 homeostasis<sup>72</sup>. For example, increased eosinophil activation has been detected in patients with  
360 ulcerative colitis (UC), as compared to controls. Interestingly, the number of activated eosinophils  
361 was shown to be greater during the remission phase of UC<sup>73</sup>, which may suggest a dual role in  
362 intestinal inflammation and repair. We found that in mice lacking both eosinophils and microbiota,  
363 collagen deposition in the submucosal layer was double to that of mice deficient in either  
364 eosinophils or microbiota alone (**Fig. 5B, C**), suggesting that at least certain components of tissue  
365 remodeling are regulated by interactions between the microbiota and eosinophils.

366 Several lines of evidence have indicated that dysbiosis in humans is associated with an  
367 increased prevalence of allergic sensitization<sup>57,59,74-76</sup>. However, the mechanisms underlying this  
368 association remain to be fully elucidated. It was recently shown that GF and antibiotic-treated mice  
369 developed increased allergic sensitization as compared to SPF mice<sup>62</sup>. On the other hand, we have  
370 shown that enteric eosinophils are essential to the induction of allergic sensitization in SPF mice<sup>6</sup>.  
371 These observations raise the question of whether the microbiota and enteric eosinophils synergize  
372 in the induction of allergic sensitization. Here, having demonstrated that GF mice exhibit  
373 heightened eosinophilia, we show that the absence of eosinophils in GF mice results in an  
374 attenuation of allergic sensitization. Thus, these data support the concept that the microbiota  
375 influences the capacity to develop allergic sensitization, at least in part, through its effects on  
376 enteric eosinophils.

377 In summary, this study demonstrates that eosinophil frequency and activation in the  
378 intestinal mucosa is regulated by the microbiota. It also shows that processes such as tissue repair  
379 and the induction of allergic sensitization appear to be regulated by an interplay between the  
380 commensal microbiota and intestinal eosinophils. Given that the tissue microenvironment crucially  
381 shapes the nature and evolution of subsequent antigen-host interactions, these data have  
382 fundamental implications to understanding the role of the microbiota and eosinophils in health and  
383 disease.

## 384 385 **AUTHOR CONTRIBUTIONS**

386 RJS conceptualized the project and designed experiments. RJS and VA performed experiments,  
387 analyzed the data and wrote the manuscript. TW, MEG, TSM, RC, JFK, YE and AH helped with  
388 experiments. HJG conducted experiments in the Axenic and Gnotobiotic Unit. EFV generated  
389 GATA-GF mice. SA and KA performed HALO analysis. JE conducted EM analysis. EFV, KA

390 and DKC provided scientific input and revised the manuscript. MJ obtained funding, oversaw the  
391 project and edited the manuscript.

392

### 393 **FUNDING**

394 This work was supported by Food Allergy Canada, the Delaney family, the Zych family, the Walter  
395 and Maria Schroeder Foundation and AllerGen NCE. EFV holds a Canada Research Chair and is  
396 funded by CIHR grant MOP# 142773.

397

### 398 **ACKNOWLEDGMENTS**

399 We acknowledge Dr. Puja Bagri for critical review of the manuscript. We thank all the members  
400 of the Jordana Lab for technical help and scientific input.

401

### 402 **REFERENCES**

- 403 1 Lee, J. J., Jacobsen, E. A., McGarry, M. P., Schleimer, R. P. & Lee, N. A. Eosinophils in  
404 health and disease: the LIAR hypothesis. *Clin Exp Allergy* **40**, 563-575,  
405 doi:10.1111/j.1365-2222.2010.03484.x (2010).
- 406 2 Rosenberg, H. F., Dyer, K. D. & Foster, P. S. Eosinophils: changing perspectives in health  
407 and disease. *Nat Rev Immunol* **13**, 9-22, doi:10.1038/nri3341 (2013).
- 408 3 Arnold, I. C. *et al.* Eosinophils suppress Th1 responses and restrict bacterially induced  
409 gastrointestinal inflammation. *J Exp Med* **215**, 2055-2072, doi:10.1084/jem.20172049  
410 (2018).
- 411 4 Abdala-Valencia, H. *et al.* Shaping eosinophil identity in the tissue contexts of  
412 development, homeostasis, and disease. *J Leukoc Biol* **104**, 95-108,  
413 doi:10.1002/JLB.1MR1117-442RR (2018).
- 414 5 Xenakis, J. J. *et al.* Resident intestinal eosinophils constitutively express antigen  
415 presentation markers and include two phenotypically distinct subsets of eosinophils.  
416 *Immunology* **154**, 298-308, doi:10.1111/imm.12885 (2018).
- 417 6 Chu, D. K. *et al.* Indigenous enteric eosinophils control DCs to initiate a primary Th2  
418 immune response in vivo. *J Exp Med* **211**, 1657-1672, doi:10.1084/jem.20131800 (2014).
- 419 7 Canas, J. A. *et al.* Eosinophil-derived exosomes contribute to asthma remodelling by  
420 activating structural lung cells. *Clin Exp Allergy* **48**, 1173-1185, doi:10.1111/cea.13122  
421 (2018).
- 422 8 Takemura, N. *et al.* Eosinophil depletion suppresses radiation-induced small intestinal  
423 fibrosis. *Sci Transl Med* **10**, doi:10.1126/scitranslmed.aan0333 (2018).
- 424 9 Bordon, Y. Mucosal immunology: eosinophils get the party started. *Nat Rev Immunol* **14**,  
425 580-581, doi:10.1038/nri3731 (2014).
- 426 10 Hogan, S. P., Waddell, A. & Fulkerson, P. C. Eosinophils in infection and intestinal  
427 immunity. *Curr Opin Gastroenterol* **29**, 7-14, doi:10.1097/MOG.0b013e32835ab29a  
428 (2013).
- 429 11 Filippone, R. T., Sahakian, L., Apostolopoulos, V. & Nurgali, K. Eosinophils in  
430 Inflammatory Bowel Disease. *Inflammatory bowel diseases* **25**, 1140-1151,  
431 doi:10.1093/ibd/izz024 (2019).

- 432 12 Yang, B. G., Seoh, J. Y. & Jang, M. H. Regulatory Eosinophils in Inflammation and  
433 Metabolic Disorders. *Immune Netw* **17**, 41-47, doi:10.4110/in.2017.17.1.41 (2017).
- 434 13 Sugawara, R. *et al.* Small intestinal eosinophils regulate Th17 cells by producing IL-1  
435 receptor antagonist. *J Exp Med* **213**, 555-567, doi:10.1084/jem.20141388 (2016).
- 436 14 Matsumoto, K., Fukuda, S., Nakamura, Y. & Saito, H. Amphiregulin production by human  
437 eosinophils. *Int Arch Allergy Immunol* **149 Suppl 1**, 39-44, doi:10.1159/000210652  
438 (2009).
- 439 15 Wen, T. & Rothenberg, M. E. The Regulatory Function of Eosinophils. *Microbiol Spectr* **4**,  
440 doi:10.1128/microbiolspec.MCHD-0020-2015 (2016).
- 441 16 Shi, N., Li, N., Duan, X. & Niu, H. Interaction between the gut microbiome and mucosal  
442 immune system. *Mil Med Res* **4**, 14, doi:10.1186/s40779-017-0122-9 (2017).
- 443 17 McDermott, A. J. & Huffnagle, G. B. The microbiome and regulation of mucosal  
444 immunity. *Immunology* **142**, 24-31, doi:10.1111/imm.12231 (2014).
- 445 18 Smith, K., McCoy, K. D. & Macpherson, A. J. Use of axenic animals in studying the  
446 adaptation of mammals to their commensal intestinal microbiota. *Semin. Immunol.* **19**,  
447 59-69, doi:10.1016/j.smim.2006.10.002 (2007).
- 448 19 Crabbe, P. A., Bazin, H., Eyssen, H. & Heremans, J. F. The normal microbial flora as a  
449 major stimulus for proliferation of plasma cells synthesizing IgA in the gut. The germ-  
450 free intestinal tract. *Int Arch Allergy Appl Immunol* **34**, 362-375 (1968).
- 451 20 Bandeira, A. *et al.* Localization of gamma/delta T cells to the intestinal epithelium is  
452 independent of normal microbial colonization. *J Exp Med* **172**, 239-244 (1990).
- 453 21 Rosenberg, H. F., Masterson, J. C. & Furuta, G. T. Eosinophils, probiotics, and the  
454 microbiome. *J Leukoc Biol* **100**, 881-888, doi:10.1189/jlb.3RI0416-202R (2016).
- 455 22 Slack, E. *et al.* Innate and adaptive immunity cooperate flexibly to maintain host-  
456 microbiota mutualism. *Science* **325**, 617-620, doi:10.1126/science.1172747 (2009).
- 457 23 Galipeau, H. J. *et al.* Intestinal microbiota modulates gluten-induced immunopathology  
458 in humanized mice. *Am J Pathol* **185**, 2969-2982, doi:10.1016/j.ajpath.2015.07.018  
459 (2015).
- 460 24 Jimenez-Saiz, R. *et al.* Lifelong memory responses perpetuate humoral TH2 immunity  
461 and anaphylaxis in food allergy. *J Allergy Clin Immunol* **140**, 1604-1615 e1605,  
462 doi:10.1016/j.jaci.2017.01.018 (2017).
- 463 25 Carlens, J. *et al.* Common gamma-chain-dependent signals confer selective survival of  
464 eosinophils in the murine small intestine. *J Immunol* **183**, 5600-5607,  
465 doi:10.4049/jimmunol.0801581 (2009).
- 466 26 Jimenez-Saiz, R., Rupa, P. & Mine, Y. Immunomodulatory effects of heated ovomucoid-  
467 depleted egg white in a BALB/c mouse model of egg allergy. *J Agric Food Chem* **59**,  
468 13195-13202, doi:10.1021/jf202963r (2011).
- 469 27 Anipindi, V. C. *et al.* Estradiol Enhances CD4+ T-Cell Anti-Viral Immunity by Priming  
470 Vaginal DCs to Induce Th17 Responses via an IL-1-Dependent Pathway. *PLoS Pathog* **12**,  
471 e1005589, doi:10.1371/journal.ppat.1005589 (2016).
- 472 28 Chu, D. K. *et al.* IL-33, but not thymic stromal lymphopoietin or IL-25, is central to mite  
473 and peanut allergic sensitization. *J Allergy Clin Immunol* **131**, 187-200 e181-188,  
474 doi:10.1016/j.jaci.2012.08.002 (2013).

- 475 29 Humbles, A. A. *et al.* Kinetics of eotaxin generation and its relationship to eosinophil  
476 accumulation in allergic airways disease: analysis in a guinea pig model in vivo. *J Exp*  
477 *Med* **186**, 601-612, doi:10.1084/jem.186.4.601 (1997).
- 478 30 Ghia, J. E., Blennerhassett, P., Kumar-Ondiveeran, H., Verdu, E. F. & Collins, S. M. The  
479 vagus nerve: a tonic inhibitory influence associated with inflammatory bowel disease in  
480 a murine model. *Gastroenterology* **131**, 1122-1130, doi:10.1053/j.gastro.2006.08.016  
481 (2006).
- 482 31 Swirski, F. K. *et al.* Chronic exposure to innocuous antigen in sensitized mice leads to  
483 suppressed airway eosinophilia that is reversed by granulocyte macrophage colony-  
484 stimulating factor. *J Immunol* **169**, 3499-3506, doi:10.4049/jimmunol.169.7.3499 (2002).
- 485 32 Chu, D. K. *et al.* T helper cell IL-4 drives intestinal Th2 priming to oral peanut antigen,  
486 under the control of OX40L and independent of innate-like lymphocytes. *Mucosal*  
487 *Immunol* **7**, 1395-1404, doi:10.1038/mi.2014.29 (2014).
- 488 33 Jimenez-Saiz, R. *et al.* IgG1(+) B-cell immunity predates IgE responses in epicutaneous  
489 sensitization to foods. *Allergy* **74**, 165-175, doi:10.1111/all.13481 (2019).
- 490 34 Goldner, J. A modification of the masson trichrome technique for routine laboratory  
491 purposes. *Am J Pathol* **14**, 237-243 (1938).
- 492 35 Fischer, A. H., Jacobson, K. A., Rose, J. & Zeller, R. Hematoxylin and eosin staining of  
493 tissue and cell sections. *CSH Protoc* **2008**, pdb prot4986, doi:10.1101/pdb.prot4986  
494 (2008).
- 495 36 Dyer, K. D., Garcia-Crespo, K. E., Killoran, K. E. & Rosenberg, H. F. Antigen profiles for the  
496 quantitative assessment of eosinophils in mouse tissues by flow cytometry. *J Immunol*  
497 *Methods* **369**, 91-97, doi:10.1016/j.jim.2011.04.009 (2011).
- 498 37 Levenson, S. M. & Tennant, B. Some metabolic and nutritional studies with germfree  
499 animals. *Fed Proc* **22**, 109-119 (1963).
- 500 38 Gordon, H. A. Morphological and physiological characterization of germfree life. *Ann N Y*  
501 *Acad Sci* **78**, 208-220, doi:10.1111/j.1749-6632.1959.tb53104.x (1959).
- 502 39 Meslin, J. C., Sacquet, E. & Guenet, J. L. [Action of bacterial flora on the morphology and  
503 surface mucus of the small intestine of the rat]. *Ann Biol Anim Biochim Biophys* **13**, 203-  
504 214 (1973).
- 505 40 Meslin, J. C. & Sacquet, E. Effects of microflora on the dimensions of enterocyte  
506 microvilli in the rat. *Reprod Nutr Dev* **24**, 307-314 (1984).
- 507 41 Gordon, H. A. & Bruckner-Kardoss, E. Effect of normal microbial flora on intestinal  
508 surface area. *Am J Physiol* **201**, 175-178, doi:10.1152/ajplegacy.1961.201.1.175 (1961).
- 509 42 Glaister, J. R. Factors affecting the lymphoid cells in the small intestinal epithelium of the  
510 mouse. *Int Arch Allergy Appl Immunol* **45**, 719-730 (1973).
- 511 43 Abrams, G. D., Bauer, H. & Sprinz, H. Influence of the normal flora on mucosal  
512 morphology and cellular renewal in the ileum. A comparison of germ-free and  
513 conventional mice. *Lab Invest* **12**, 355-364 (1963).
- 514 44 Sellers, R. S., Clifford, C. B., Treuting, P. M. & Brayton, C. Immunological variation  
515 between inbred laboratory mouse strains: points to consider in phenotyping genetically  
516 immunomodified mice. *Vet Pathol* **49**, 32-43, doi:10.1177/0300985811429314 (2012).
- 517 45 Perez-Munoz, M. E., Arrieta, M. C., Ramer-Tait, A. E. & Walter, J. A critical assessment of  
518 the "sterile womb" and "in utero colonization" hypotheses: implications for research on



- 519 the pioneer infant microbiome. *Microbiome* **5**, 48, doi:10.1186/s40168-017-0268-4  
520 (2017).
- 521 46 Smith, K., McCoy, K. D. & Macpherson, A. J. Use of axenic animals in studying the  
522 adaptation of mammals to their commensal intestinal microbiota. *Semin Immunol* **19**,  
523 59-69, doi:10.1016/j.smim.2006.10.002 (2007).
- 524 47 Macpherson, A. J. & Harris, N. L. Interactions between commensal intestinal bacteria  
525 and the immune system. *Nat Rev Immunol* **4**, 478-485, doi:10.1038/nri1373 (2004).
- 526 48 Round, J. L. & Mazmanian, S. K. The gut microbiota shapes intestinal immune responses  
527 during health and disease. *Nat Rev Immunol* **9**, 313-323, doi:10.1038/nri2515 (2009).
- 528 49 Faria, A. M. *et al.* Food components and the immune system: from tonic agents to  
529 allergens. *Front Immunol* **4**, 102, doi:10.3389/fimmu.2013.00102 (2013).
- 530 50 Griseri, T. *et al.* Granulocyte Macrophage Colony-Stimulating Factor-Activated  
531 Eosinophils Promote Interleukin-23 Driven Chronic Colitis. *Immunity* **43**, 187-199,  
532 doi:10.1016/j.immuni.2015.07.008 (2015).
- 533 51 Davoine, F. & Lacy, P. Eosinophil cytokines, chemokines, and growth factors: emerging  
534 roles in immunity. *Front Immunol* **5**, 570, doi:10.3389/fimmu.2014.00570 (2014).
- 535 52 Feistritzer, C. *et al.* Expression and function of the vascular endothelial growth factor  
536 receptor FLT-1 in human eosinophils. *Am J Respir Cell Mol Biol* **30**, 729-735,  
537 doi:10.1165/rcmb.2003-0314OC (2004).
- 538 53 Cao, Q., Zhang, T. & Zhang, J. Correlation analysis of STAT3 and VEGF expression and  
539 eosinophil infiltration in nasal polyps. *Eur Arch Otorhinolaryngol* **272**, 1955-1960,  
540 doi:10.1007/s00405-014-3290-1 (2015).
- 541 54 Wang, J. *et al.* IL-11 Selectively Inhibits Aeroallergen-Induced Pulmonary Eosinophilia  
542 and Th2 Cytokine Production. *The Journal of Immunology* **165**, 2222-2231,  
543 doi:10.4049/jimmunol.165.4.2222 (2000).
- 544 55 Fulkerson, P. C., Zhu, H., Williams, D. A., Zimmermann, N. & Rothenberg, M. E. CXCL9  
545 inhibits eosinophil responses by a CCR3- and Rac2-dependent mechanism. *Blood* **106**,  
546 436-443, doi:10.1182/blood-2005-02-0489 (2005).
- 547 56 White, S. R., Kulp, G. V., Spaethe, S. M., Van Alstyne, E. & Leff, A. R. A kinetic assay for  
548 eosinophil peroxidase activity in eosinophils and eosinophil conditioned media. *J*  
549 *Immunol Methods* **144**, 257-263 (1991).
- 550 57 Plunkett, C. H. & Nagler, C. R. The Influence of the Microbiome on Allergic Sensitization  
551 to Food. *J Immunol* **198**, 581-589, doi:10.4049/jimmunol.1601266 (2017).
- 552 58 Pascal, M. *et al.* Microbiome and Allergic Diseases. *Front Immunol* **9**, 1584,  
553 doi:10.3389/fimmu.2018.01584 (2018).
- 554 59 Zimmermann, P., Messina, N., Mohn, W. W., Finlay, B. B. & Curtis, N. Association  
555 between the intestinal microbiota and allergic sensitization, eczema, and asthma: A  
556 systematic review. *J Allergy Clin Immunol* **143**, 467-485, doi:10.1016/j.jaci.2018.09.025  
557 (2019).
- 558 60 Feehley, T. *et al.* Healthy infants harbor intestinal bacteria that protect against food  
559 allergy. *Nat Med* **25**, 448-453, doi:10.1038/s41591-018-0324-z (2019).
- 560 61 McCoy, K. D., Ignacio, A. & Geuking, M. B. Microbiota and Type 2 immune responses.  
561 *Curr Opin Immunol* **54**, 20-27, doi:10.1016/j.coi.2018.05.009 (2018).

- 562 62 Stefka, A. T. *et al.* Commensal bacteria protect against food allergen sensitization. *Proc*  
563 *Natl Acad Sci U S A* **111**, 13145-13150, doi:10.1073/pnas.1412008111 (2014).
- 564 63 Arias, K. *et al.* Distinct immune effector pathways contribute to the full expression of  
565 peanut-induced anaphylactic reactions in mice. *J Allergy Clin Immunol* **127**, 1552-1561  
566 e1551, doi:10.1016/j.jaci.2011.03.044 (2011).
- 567 64 Kong, J. *et al.* Comprehensive metabolomics identifies the alarmin uric acid as a critical  
568 signal for the induction of peanut allergy. *Allergy* **70**, 495-505, doi:10.1111/all.12579  
569 (2015).
- 570 65 Travers, J. & Rothenberg, M. E. Eosinophils in mucosal immune responses. *Mucosal*  
571 *Immunol* **8**, 464-475, doi:10.1038/mi.2015.2 (2015).
- 572 66 Kita, H. Eosinophils: multifaceted biological properties and roles in health and disease.  
573 *Immunol Rev* **242**, 161-177, doi:10.1111/j.1600-065X.2011.01026.x (2011).
- 574 67 Mowat, A. M. & Bain, C. C. News & Highlights. *Mucosal Immunology* **3**, 420-421,  
575 doi:10.1038/mi.2010.24 (2010).
- 576 68 Mishra, A., Hogan, S. P., Lee, J. J., Foster, P. S. & Rothenberg, M. E. Fundamental signals  
577 that regulate eosinophil homing to the gastrointestinal tract. *J Clin Invest* **103**, 1719-  
578 1727, doi:10.1172/JCI6560 (1999).
- 579 69 Szantho, E. *et al.* Comparative Analysis of Multicolor Flow Cytometry and  
580 Immunohistochemistry for the Detection of Disseminated Tumor Cells. *Appl*  
581 *Immunohistochem Mol Morphol* **26**, 305-315, doi:10.1097/PAI.0000000000000519  
582 (2018).
- 583 70 Menezes, J. S. *et al.* Immunological activities are modulated by enteral administration of  
584 an elemental diet in mice. *Clin Nutr* **25**, 643-652, doi:10.1016/j.clnu.2006.01.005 (2006).
- 585 71 Hammel, I., Lagunoff, D. & Galli, S. J. Regulation of secretory granule size by the precise  
586 generation and fusion of unit granules. *J Cell Mol Med* **14**, 1904-1916,  
587 doi:10.1111/j.1582-4934.2010.01071.x (2010).
- 588 72 Shamri, R., Xenakis, J. J. & Spencer, L. A. Eosinophils in innate immunity: an evolving  
589 story. *Cell Tissue Res* **343**, 57-83, doi:10.1007/s00441-010-1049-6 (2011).
- 590 73 Lampinen, M. *et al.* Eosinophil granulocytes are activated during the remission phase of  
591 ulcerative colitis. *Gut* **54**, 1714-1720, doi:10.1136/gut.2005.066423 (2005).
- 592 74 Risnes, K. R., Belanger, K., Murk, W. & Bracken, M. B. Antibiotic exposure by 6 months  
593 and asthma and allergy at 6 years: Findings in a cohort of 1,401 US children. *Am J*  
594 *Epidemiol* **173**, 310-318, doi:10.1093/aje/kwq400 (2011).
- 595 75 Russell, S. L. *et al.* Early life antibiotic-driven changes in microbiota enhance  
596 susceptibility to allergic asthma. *EMBO Rep* **13**, 440-447, doi:10.1038/embor.2012.32  
597 (2012).
- 598 76 Metzler, S. *et al.* Association between antibiotic treatment during pregnancy and infancy  
599 and the development of allergic diseases. *Pediatric Allergy and Immunology* **30**, 423-  
600 433, doi:10.1111/pai.13039 (2019).
- 601
